# Supplementary material
Source: PubMed Central journal article supplement (PMC5460923)
Supplement: en.2016-1707.st1.pdf [file en.2016-1707.st1.pdf]

**Supplemental Table 1: miRNA qPCR primers.**

| miRNA           | Target Sequence         | Exiqon Product # |
|-----------------|-------------------------|------------------|
| rno-miR-15b-5p  | UAGCAGCACAUCAUGGUUUACA  | 204243           |
| rno-miR-17-5p   | CAAAGUGCUUACAGUGCAGGUAG | 204771           |
| rno-miR-20a-5p  | UAAAGUGCUUAUAGUGCAGGUAG | 204292           |
| rno-miR-21-5p   | UAGCUUAUCAGACUGAUGUUGA  | 204230           |
| rno-miR-21a-3p  | CAACAGCAGUCGAUGGGCUGUC  | 205400           |
| rno-miR-34c-3p  | AAUCACUAACCACACAGCCAGG  | 205424           |
| rno-miR-140-5p  | CAGUGGUUUUACCCUAUGGUAG  | 204540           |
| rno-miR-140-3p  | UACCACAGGGUAGAACCACGG   | 204304           |
| rno-miR-150-5p  | UCUCCCAACCCUUGUACCAGUG  | 204660           |
| rno-miR-184-3p  | UGGACGGAGAACUGAUAAAGGGU | 204601           |
| rno-miR-193a-3p | AACUGGCCUACAAAGUCCCAGU  | 204591           |
| rno-miR-199a-5p | CCCAGUGUUCAGACUACCGUUC  | 204494           |
| rno-miR-199a-3p | ACAGUAGUCUGCACAUUGGUUA  | 204536           |
| rno-miR-208a-3p | AUAAGACGAGCAAAAAGCUUGU  | 204680           |
| rno-miR-214-3p  | ACAGCAGGCACAGACAGGCAGU  | 204510           |
| rno-miR-221-3p  | AGCUACAUUGUCUGCUGGGUUUC | 204532           |
| rno-miR-222-3p  | AGCUACAUCUGGCUACUGGGU   | 204551           |
| rno-miR-223-3p  | UGUCAGUUUGUCAAAUACCCC   | 205120           |
| rno-miR-300-5p  | UUGAAGAGAGGUUAUCCUUUGU  | 205412           |

|                |                                                                                                                                                                           |         |
|----------------|---------------------------------------------------------------------------------------------------------------------------------------------------------------------------|---------|
| rno-miR-300-3p | UAUGCAAGGGCAAGCUCUCUUC                                                                                                                                                    | 205066  |
| rno-miR-329-5p | AGAGGUUUUCUGGGUCUCUGUUUC                                                                                                                                                  | 2102152 |
| rno-miR-329-3p | AACACACCCAGCUAACCUUUUUU                                                                                                                                                   | 205183  |
| rno-let-7f-5p  | UGAGGUAGUAGAUUGUAUAGUU                                                                                                                                                    | 204359  |
| rno-RNU1A1     | AUACUUACCUGGCAGGGGAGAUACCAUGAUCACGAAGGUGGUUUUCCAGGGCGAGGCUUA<br>UCCAUUGCACUCCGGAUGUGCUGACCCUGCGAUUUCCCCAAAUGUGGGAAACUCGACUGCA<br>UAAUUUGUGGUAGUGGGGGACUGCGUUCGCGCUUCCCCUG | 203909  |
| rno-RNU5G      | AUACUCUGGUUUCUCUUCAGAU CGCAUAAAUCUUUCGCCUUUUACUAAAGAUUCCGUGGA<br>GAGGAACAACUCUGAGUCUUAACCCAAUUUUUUGAGCCUUGCUCGACAAGGCUA                                                   | 203908  |
| rno-U6 snRNA   | GUGCUCGCUUCGGCAGCACAUAUACUAAAAUUGGAACGAUACAGAGAAGAUUAGCAUGGCC<br>CCUGCGCAAGGAUGACACGCAAAUUCGUGAAGCGUCCAUUUUUU                                                             | 203907  |

**Supplemental Table 2: qPCR Primers.**

| Gene           | Accession # |                    | Sequence                                           | Annealing Temp (C) | Amplicon size (bp) |
|----------------|-------------|--------------------|----------------------------------------------------|--------------------|--------------------|
| Ccl2 (MCP-1)   | NM_031530   | Sense<br>Antisense | TAGCATCCACGTGCTGTCTC<br>CCGACTCATTGGGATCATCT       | 60.0               | 91                 |
| Col1a1         | NM_053304   | Sense<br>Antisense | GAGCGGAGAGTACTGGATCG<br>TACTCGAACGGGAATCCATC       | 58.0               | 204                |
| Col3a1         | NM_032085   | Sense<br>Antisense | GGAAAAGATGGATCAAGTGGACAT<br>GAGCCCTCAGATCCTCTTTTAC | 60.0               | 86                 |
| Ctgf           | NM_022266   | Sense<br>Antisense | TGTGAAGACCTACCGGGCTA<br>TTCATGATCTCGCCATCGGG       | 65.0               | 117                |
| Ddr2           | NM_031764   | Sense<br>Antisense | AACAGGTGCTTGATGGGAAC<br>GACTGGGATAAGGCCAACAA       | 65.0               | 95                 |
| Fn1            | NM_019143   | Sense<br>Antisense | CAAGGTCCGAGAAGAGGTTG<br>CCGTGTAAGGGTCAAAGCAT       | 65.0               | 92                 |
| Fsp1 (*S100a4) | NM_012618   | Sense<br>Antisense | AGGACAGACGAAGCTGCATT<br>TGCAGGACAGGAAGACACAG       | 65.0               | 100                |
| GAPDH          | NM_017008   | Sense<br>Antisense | GTTCATAGACAAGATGGTGAAG<br>GAACATGTAGACCATGTAGTTGAG | 60.0               | 149                |
| Hmox1          | NM_012580   | Sense<br>Antisense | TCTATCGTGCTCGCATGAAC<br>AAGGCGGTCTTAGCCTCTTC       | 60.0               | 79                 |
| Il1b           | NM_031512   | Sense<br>Antisense | AGGAAGGCAGTGTCATCATTGT<br>CTTGGGTCCTCATCCTGGAA     | 60.0               | 89                 |
| Myh6           | NM_017239   | Sense<br>Antisense | AGTGACAGGATGACGGATGC<br>TAGGCGCTCCTTCTTGACT        | 60.0               | 81                 |
| Myh7           | NM_017240   | Sense<br>Antisense | AAGGCATCGAGTGGACGTTT<br>TTGGGGAACATGCACTCCTC       | 60.0               | 115                |

|                  |              |                    |                                                   |      |     |
|------------------|--------------|--------------------|---------------------------------------------------|------|-----|
| Nppa             | NM_012612    | Sense<br>Antisense | AGGGCTTCTCCTCTTCCTG<br>TGTTGGACACCGCACTGTAT       | 60.0 | 78  |
| Nppb             | NM_031545    | Sense<br>Antisense | TTAGGTCTCAAGACAGCGCC<br>CGCCGATCCGGTCTATCTTC      | 65.0 | 102 |
| Nr3c2            | NM_013131    | Sense<br>Antisense | ATCTGTTTGGTGTGTGGAGATG<br>CACGGCTCTTTTGAAGAAGACT  | 60.0 | 90  |
| Postn            | NM_001108550 | Sense<br>Antisense | ACCAAACCTCGTGGAACCAAA<br>GGATCTTCGTCATTGCAGGT     | 65.0 | 88  |
| Serpine1 (PAI-1) | NM_012620    | Sense<br>Antisense | GGAGAGGCACACCAAAGGTA<br>CAGGCGTGTGAGCTCATTTA      | 65.0 | 70  |
| Spp1 (OPN)       | NM_012881    | Sense<br>Antisense | GATCGATAGTGCCGAGAAGC<br>TGAAACTCGTGGCTCTGATG      | 65.0 | 111 |
| Tgfb1            | NM_021578    | Sense<br>Antisense | GCTGCTGACCCCCACTGAT<br>GCCACTGCCGGACAACCTC        | 60.0 | 68  |
| Tgfb2            | NM_031131    | Sense<br>Antisense | CAACACCATAAACCCCGAAG<br>AGGATGGTCAGTGGTTCCAG      | 65.0 | 72  |
| Thy1             | NM_012673    | Sense<br>Antisense | CCGCGTCAACCTTTTCAGTG<br>GTAGTCGCCCTCATCCTTGG      | 65.0 | 79  |
| Timp1            | NM_053819    | Sense<br>Antisense | GGTTCCTGGCATAATCTGA<br>ATGGCTGAACAGGGAAACAC       | 65.0 | 99  |
| Vcam1            | NM_012889    | Sense<br>Antisense | CCTAAGGATCCAGAGATTCAATTCA<br>GGGTAACATCAGGAGCCAAC | 60.0 | 86  |
| Vim              | NM_031140    | Sense<br>Antisense | ACGAATACCGGAGACAGGTG<br>CAGCTTCAAGGGCAAATTC       | 60.0 | 117 |

**Supplemental Table 3: Northern-blot probes.**

| miRNA         | Sequence                | Exiqon Product # |
|---------------|-------------------------|------------------|
| rno-miR-21-5p | TCAACATCAGTCTGATAAGCTA  | 38102-00         |
| rno-let-7f    | AACTATAACAATCTACTACCTCA | 18005-00         |
